# Supplementary material for: Prospective validation of a transcriptomic severity classifier among patients with suspected acute infection and sepsis in the emergency department
Source: PubMed Central journal article supplement — Eur J Emerg Med. 2022 Apr 21;29(5):357–65. doi: 10.1097/MEJ.0000000000000931 (PMC9432813; doi:10.1097/mej.0000000000000931), 2022-04-21
Supplement: ejem-29-357-s001.pdf [file ejem-29-357-s001.pdf]

## **Additional File 1: Supplementary Methods**

### **Patient Enrolment and Sample Collection**

A prospective, observational study was conducted at the Emergency Department (ED) of the Charité-Universitätsmedizin Berlin, Campus Benjamin Franklin (Berlin, Germany) from February until December 2019. Enrolment criteria were i) adult patients ( $\geq 18$  years) presenting to the ED with clinically suspected acute infections, ii) at least one vital sign change (temperature  $>38^{\circ}\text{C}$  or  $<36^{\circ}\text{C}$ , respiratory rate  $>20/\text{min}$ , heart rate  $>90/\text{min}$ , systolic blood pressure  $<100\text{mmHg}$  or altered mental state), and iii) consent, including retroactive consent, by self or legal guardian. Suspicion of infection was determined by the triage nurses and treating physicians at the point of presentation to the ED. At enrolment, 2.5 mL of whole blood was collected in PAXgene® blood RNA tubes (PreAnalytix, Hombrechtikon, Switzerland) and then processed and stored at  $-80^{\circ}\text{C}$  following the manufacturer instructions.

### **Sample Processing**

RNA was extracted from PAXgene Blood RNA tubes on the QiaCube<sup>(R)</sup> Connect platform with the RNeasy<sup>(R)</sup> Plus Micro Kit (all QIAGEN, Hilden, Germany). Expression of the 29-mRNAs was quantified from 150 ng of RNA input using the NanoString nCounter<sup>(R)</sup> SPRINT profiler (NanoString, Seattle, WA) with four housekeeping genes used for normalization. mRNA counts were used as input to the IMX-SEV-2 classifier.

### **Statistical Analysis**

Linear regression with the IMX-SEV-2 score as an outcome variable and mortality, age, sex, infection status, and immunocompromised status as predictor variables was used to assess whether patient characteristics other than mortality status had an impact on the IMX-SEV-2 score. *P*-values were calculated using Mann-Whitney U and Fisher's Exact tests for continuous and nominal variables, respectively, and DeLong's method for comparing AUROCs. Statistical analyses were performed in R version 3.6.1 (R Foundation for Statistical Computing, Vienna, Austria). Receiver Operating Characteristics were calculated and plotted using the pROC package. Precision Recall Curves were calculated using the PRROC package, and bias-corrected and accelerated confidence intervals and tests for significant differences were performed with the boot package.

## IMX-SEV-2 classifier development

The datasets used for classifier development are shown in Supplemental Table S5. We started with a set of 69 features: 1) gene expression for the individual 29 diagnostic markers, 2) geometric and arithmetic means (20 features for each type of mean) of subsets of the markers grouped based on high or low expression according to patient infection or 30-day mortality status (based on previous work[1-3]). We then processed these 69 gene expression features with the H2O.ai software suite (version 1.8)[4], generating an additional 171 features based on pairwise sums, differences, products and ratios of the original 69 features. We filtered these 240 features (69 expression features + 171 engineered feature combinations) such that no pair of features shared a pairwise Pearson correlation coefficient greater than 0.995. This filtration step resulted in 209 remaining features that were used for subsequent classifier development. We then selected the classifier for final validation using both grid and random sampling-based methods to search hyperparameter spaces of multiple classifier types (e.g., multi-layer perceptrons, support vector classifiers, etc.) as described previously[1]. In addition to model hyperparameters (e.g., value of LASSO penalty coefficient, if used), we treated the size of the feature set used for training as a model hyperparameter. We ranked each of the aforementioned 209 features according to their Pearson correlation with the outcome of interest (30-day mortality). In our hyperparameter tuning search, we considered a different subset of the top-ranking features (e.g., top 5, top 10, up to top 200) from this set of 209 features as input to the classifier being tuned. We evaluated each candidate classifier (a given top-ranking subset of features and model hyperparameter settings) in grouped five-fold cross-validation, training the classifier on each subset of four of the folds and generating predicted probabilities for the remaining fold. We used grouped five-fold cross-validation, restricting patients from each study to appear in only one of the five folds, to preserve study-specific structure and to give more realistic estimates of the model's generalization performance. We pooled the predicted probabilities across the five validation folds and computed the AUROC for 30-day mortality events. We found that a logistic regression classifier trained on the top 150 features achieved the highest AUROC (0.905, 95% CI 0.891–0.920) for 30-day mortality, and this classifier was called IMX-SEV-2. In Supplementary Fig. S3A, we show the ROC curve of IMX-SEV-2 as computed from the pooled predicted probabilities in cross-validation. Owing to class imbalance for 30-day mortality in our dataset (0.070 baseline rate of occurrence of 30-day mortality), we also show the precision-recall curve (AUPR = 0.428) in Supplementary Figure S3B.

The genes measured in the assay have been previously described [1]. Of the 29 mRNAs, 11 are used to determine infection severity (DEFA4, CD163, RGS1, PER1, HIF1A, SEPP1, C11orf74, CIT, LY86, TST, KCNJ2), while 18 are used in determining infection status (CEACAM1, ZDHHC19, C9orf95, GNA15, BATF, C3AR1, KIAA1370, TGFBI, MTCH1, RPGRIP1, HLA-DPB1, HK3, TNIP1, GPAA1, CTSB, IFI27, JUP, LAX1).

## Supplemental Data

| Internal ID | Age | Male | Lactate | qSOFA | NEWS2 | In-Hospital Mortality | Multi-Organ Failure | Immuno-suppression | IMX-SEV-2 |
|-------------|-----|------|---------|-------|-------|-----------------------|---------------------|--------------------|-----------|
| 101         | 76  | 1    | 1.954   | 2     | 8     | 0                     | 1                   | 0                  | 0.04181   |
| 102         | 82  | 1    | 7.215   | 1     | 6     | 0                     | 0                   | 0                  | 0.05495   |
| 103         | 86  | 1    | 3.086   | 1     | 3     | 0                     | 0                   | 0                  | 0.04740   |
| 104         | 51  | 0    | 1.443   | 1     | 8     | 0                     | 0                   | 0                  | 0.02572   |
| 105         | 72  | 0    | 1.554   | 1     | 6     | 0                     | 0                   | 0                  | 0.03886   |
| 106         | 78  | 1    | 2.153   | 1     | 0     | 0                     | 0                   | 0                  | 0.03303   |
| 107         | 27  | 0    | 1.321   | 0     | 1     | 0                     | 0                   | 0                  | 0.03889   |
| 108         | 64  | 1    | 3.441   | 1     | 9     | 0                     | 1                   | 0                  | 0.07712   |
| 109         | 84  | 1    | 2.220   | 2     | 8     | 0                     | 0                   | 0                  | 0.02681   |
| 110         | 78  | 1    | 1.110   | 0     | 3     | 0                     | 0                   | 0                  | 0.03236   |
| 111         | 96  | 1    | 1.332   | 1     | 5     | 0                     | 0                   | 0                  | 0.02506   |
| 112         | 68  | 1    | 2.031   | 2     | 9     | 0                     | 1                   | 1                  | 0.02318   |
| 113         | 82  | 1    | 1.110   | 1     | 7     | 0                     | 0                   | 0                  | 0.07727   |
| 114         | 85  | 1    | 1.521   | 2     | 9     | 0                     | 0                   | 0                  | 0.02565   |
| 115         | 89  | 1    | 1.554   | 1     | 8     | 0                     | 0                   | 0                  | 0.04154   |
| 116         | 61  | 1    | 2.442   | 2     | 5     | 0                     | 1                   | 0                  | 0.07913   |
| 117         | 66  | 1    | 1.887   | 1     | 3     | 0                     | 0                   | 0                  | 0.06303   |
| 118         | 31  | 0    | 0.888   | 0     | 1     | 0                     | 0                   | 0                  | 0.02260   |
| 119         | 21  | 0    | 0.999   | 1     | 7     | 0                     | 0                   | 0                  | 0.03953   |
| 120         | 80  | 0    | 1.332   | 0     | 3     | 0                     | 0                   | 1                  | 0.05530   |
| 121         | 46  | 1    | 2.109   | 1     | 7     | 0                     | 0                   | 0                  | 0.01447   |
| 122         | 57  | 0    | 2.220   | 0     | 4     | 0                     | 0                   | 0                  | 0.01828   |
| 123         | 60  | 1    | 1.110   | 2     | 7     | 0                     | 0                   | 0                  | 0.03067   |
| 124         | 60  | 1    | 1.665   | 0     | 5     | 0                     | 0                   | 0                  | 0.02903   |
| 125         | 74  | 1    | 1.110   | 1     | 4     | 0                     | 0                   | 0                  | 0.03487   |
| 126         | 38  | 0    | 1.110   | 1     | 6     | 0                     | 0                   | 0                  | 0.01878   |
| 127         | 67  | 1    | 3.219   | 1     | 10    | 0                     | 1                   | 0                  | 0.03942   |
| 129         | 61  | 1    | 1.332   | 0     | 3     | 0                     | 0                   | 0                  | 0.02022   |
| 130         | 69  | 1    | 1.665   | 1     | 7     | 0                     | 0                   | 0                  | 0.02205   |
| 131         | 70  | 0    | 2.120   | 0     | 5     | 0                     | 0                   | 0                  | 0.02013   |
| 132         | 72  | 1    | 2.109   | 0     | 1     | 0                     | 0                   | 0                  | 0.05120   |
| 133         | 74  | 0    | 4.773   | 2     | 10    | 0                     | 1                   | 1                  | 0.04773   |
| 134         | 70  | 1    | 1.110   | 2     | 11    | 0                     | 1                   | 0                  | 0.02505   |
| 135         | 68  | 1    | 5.550   | 2     | 14    | 0                     | 1                   | 0                  | 0.19184   |
| 136         | 78  | 0    | 1.221   | 2     | 7     | 0                     | 0                   | 0                  | 0.02166   |
| 137         | 70  | 1    | 1.776   | 0     | 4     | 0                     | 0                   | 0                  | 0.03391   |
| 138         | 29  | 0    | 1.887   | 0     | 5     | 0                     | 0                   | 0                  | 0.02404   |
| 139         | 77  | 0    | 1.554   | 0     | 5     | 0                     | 0                   | 0                  | 0.04678   |
| 140         | 89  | 0    | 1.998   | 2     | 7     | 0                     | 1                   | 0                  | 0.01779   |
| 141         | 72  | 0    | 0.999   | 1     | 4     | 0                     | 0                   | 0                  | 0.03463   |

|     |    |   |       |   |    |   |   |   |         |
|-----|----|---|-------|---|----|---|---|---|---------|
| 142 | 22 | 0 | 2.109 | 2 | 7  | 0 | 0 | 0 | 0.07394 |
| 143 | 57 | 0 | 1.665 | 1 | 2  | 0 | 0 | 1 | 0.04786 |
| 144 | 84 | 1 | 1.665 | 1 | 10 | 0 | 0 | 1 | 0.06629 |
| 145 | 66 | 1 | 2.109 | 1 | 8  | 0 | 1 | 1 | 0.38451 |
| 146 | 75 | 1 | 1.776 | 1 | 8  | 0 | 0 | 0 | 0.16116 |
| 147 | 67 | 1 | 2.775 | 0 | 7  | 0 | 0 | 1 | 0.06543 |
| 148 | 78 | 0 | 1.887 | 2 | 8  | 0 | 0 | 0 | 0.07184 |
| 149 | 88 | 1 | 2.553 | 2 | 7  | 0 | 0 | 0 | 0.02922 |
| 150 | 71 | 1 | 2.109 | 0 | 1  | 0 | 0 | 0 | 0.02198 |
| 151 | 64 | 1 | 1.865 | 0 | 1  | 0 | 0 | 0 | 0.02033 |
| 152 | 76 | 1 | 1.554 | 1 | 6  | 0 | 0 | 0 | 0.03446 |
| 153 | 39 | 0 | 2.109 | 0 | 2  | 0 | 0 | 1 | 0.02836 |
| 154 | 67 | 1 | 4.329 | 1 | 6  | 0 | 1 | 0 | 0.05180 |
| 155 | 74 | 1 | 1.443 | 0 | 2  | 0 | 0 | 1 | 0.06773 |
| 156 | 62 | 1 | 2.109 | 2 | 9  | 0 | 0 | 0 | 0.02323 |
| 157 | 81 | 1 | 1.221 | 0 | 3  | 0 | 0 | 0 | 0.05264 |
| 158 | 67 | 0 | 2.220 | 1 | 1  | 0 | 0 | 0 | 0.03099 |
| 159 | 73 | 0 | 1.998 | 1 | 4  | 0 | 0 | 0 | 0.09424 |
| 160 | 77 | 1 | 1.665 | 0 | 0  | 0 | 0 | 0 | 0.03875 |
| 161 | 64 | 0 | 2.331 | 1 | 6  | 0 | 0 | 0 | 0.04239 |
| 162 | 77 | 1 | 1.665 | 0 | 3  | 0 | 0 | 0 | 0.02657 |
| 163 | 74 | 1 | 2.997 | 1 | 7  | 0 | 0 | 0 | 0.05812 |
| 164 | 21 | 0 | 1.221 | 0 | 1  | 0 | 0 | 1 | 0.04815 |
| 165 | 68 | 1 | 1.443 | 0 | 6  | 0 | 0 | 0 | 0.02977 |
| 166 | 99 | 0 | 1.332 | 3 | 7  | 0 | 0 | 0 | 0.08471 |
| 167 | 38 | 0 | 2.753 | 1 | 5  | 0 | 0 | 0 | 0.04908 |
| 168 | 52 | 0 | 0.999 | 0 | 2  | 0 | 0 | 0 | 0.05839 |
| 169 | 58 | 0 | 2.553 | 1 | 5  | 1 | 0 | 1 | 0.09728 |
| 171 | 23 | 0 | 1.221 | 1 | 8  | 0 | 0 | 0 | 0.02196 |
| 172 | 80 | 1 | 1.443 | 3 | 9  | 0 | 0 | 0 | 0.03787 |
| 173 | 69 | 0 | 1.132 | 2 | 8  | 0 | 1 | 1 | 0.08229 |
| 174 | 64 | 0 | 1.465 | 0 | 2  | 0 | 0 | 0 | 0.03789 |
| 176 | 58 | 1 | 0.777 | 0 | 5  | 0 | 0 | 1 | 0.06177 |
| 177 | 85 | 1 | 1.221 | 0 | 0  | 0 | 0 | 0 | 0.01770 |
| 178 | 79 | 0 | 1.998 | 1 | 6  | 0 | 0 | 1 | 0.02088 |
| 179 | 80 | 0 | 0.888 | 0 | 3  | 0 | 0 | 0 | 0.02066 |
| 180 | 88 | 0 | 1.998 | 0 | 1  | 0 | 0 | 0 | 0.02289 |
| 181 | 84 | 0 | 2.442 | 1 | 3  | 0 | 1 | 1 | 0.08519 |
| 182 | 76 | 1 | 1.554 | 2 | 5  | 0 | 1 | 1 | 0.05425 |
| 183 | 69 | 0 | 1.443 | 0 | 0  | 0 | 0 | 0 | 0.02917 |
| 184 | 71 | 0 | 1.887 | 1 | 4  | 0 | 0 | 0 | 0.08753 |
| 185 | 57 | 0 | 2.553 | 0 | 4  | 0 | 1 | 0 | 0.06415 |
| 186 | 84 | 0 | 2.109 | 0 | 6  | 0 | 0 | 0 | 0.02016 |

|     |    |   |        |   |    |   |   |   |         |
|-----|----|---|--------|---|----|---|---|---|---------|
| 187 | 82 | 1 | 0.888  | 1 | 8  | 0 | 0 | 0 | 0.06664 |
| 188 | 77 | 1 | 2.442  | 0 | 8  | 0 | 0 | 0 | 0.07746 |
| 189 | 84 | 0 | 2.664  | 1 | 7  | 0 | 0 | 0 | 0.04166 |
| 190 | 82 | 1 | 2.220  | 0 | 2  | 0 | 0 | 1 | 0.01683 |
| 191 | 85 | 1 | 1.665  | 3 | 11 | 0 | 1 | 0 | 0.02259 |
| 192 | 77 | 1 | 10.101 | 0 | 6  | 0 | 0 | 1 | 0.03404 |
| 193 | 91 | 1 | 3.330  | 0 | 1  | 0 | 0 | 1 | 0.02791 |
| 194 | 66 | 0 | 0.999  | 0 | 1  | 0 | 0 | 0 | 0.02656 |
| 195 | 79 | 0 | 2.109  | 3 | 13 | 0 | 1 | 0 | 0.15894 |
| 196 | 92 | 1 | 2.997  | 3 | 13 | 1 | 1 | 0 | 0.11786 |
| 197 | 81 | 0 | 1.110  | 1 | 5  | 0 | 0 | 0 | 0.03741 |
| 198 | 80 | 0 | 3.885  | 0 | 1  | 0 | 0 | 0 | 0.03642 |
| 199 | 77 | 0 | 2.553  | 2 | 12 | 0 | 1 | 0 | 0.03680 |
| 200 | 80 | 0 | 3.552  | 2 | 4  | 0 | 0 | 1 | 0.02177 |
| 201 | 80 | 1 | 1.776  | 1 | 6  | 0 | 0 | 1 | 0.05215 |
| 202 | 76 | 0 | 3.164  | 0 | 4  | 0 | 0 | 1 | 0.03473 |
| 203 | 78 | 0 | 1.665  | 1 | 6  | 1 | 1 | 1 | 0.05404 |
| 204 | 87 | 1 | 2.775  | 0 | 5  | 0 | 0 | 0 | 0.03677 |
| 205 | 54 | 1 | 1.765  | 0 | 2  | 0 | 0 | 0 | 0.02839 |
| 206 | 79 | 0 | 1.721  | 2 | 8  | 0 | 0 | 0 | 0.05577 |
| 207 | 82 | 1 | 3.996  | 1 | 8  | 0 | 1 | 0 | 0.08450 |
| 208 | 78 | 0 | 3.663  | 2 | 6  | 0 | 0 | 0 | 0.07193 |
| 209 | 64 | 0 | 2.109  | 1 | 8  | 0 | 0 | 0 | 0.06765 |
| 210 | 61 | 0 | 2.764  | 0 | 6  | 1 | 1 | 1 | 0.08731 |
| 211 | 70 | 1 | 6.771  | 0 | 4  | 0 | 0 | 0 | 0.05907 |
| 212 | 26 | 1 | 2.065  | 0 | 2  | 0 | 0 | 0 | 0.02250 |
| 213 | 40 | 1 | 0.888  | 0 | 3  | 0 | 0 | 0 | 0.01672 |
| 214 | 42 | 1 | 1.554  | 0 | 5  | 0 | 0 | 0 | 0.01856 |
| 215 | 33 | 0 | 2.031  | 1 | 8  | 0 | 0 | 0 | 0.03223 |
| 216 | 81 | 1 | 4.440  | 0 | 1  | 0 | 0 | 0 | 0.06045 |
| 217 | 81 | 0 | 1.554  | 0 | 0  | 0 | 0 | 0 | 0.08680 |
| 218 | 74 | 0 | 3.330  | 1 | 9  | 0 | 0 | 0 | 0.03515 |
| 219 | 56 | 0 | 1.543  | 0 | 2  | 0 | 0 | 0 | 0.01294 |
| 220 | 59 | 0 | 0.777  | 1 | 4  | 0 | 0 | 0 | 0.02642 |
| 221 | 26 | 0 | 1.554  | 2 | 8  | 0 | 1 | 0 | 0.02321 |
| 222 | 83 | 1 | 3.996  | 0 | 2  | 0 | 0 | 1 | 0.03722 |
| 223 | 82 | 1 | 0.999  | 0 | 1  | 0 | 0 | 0 | 0.02095 |
| 224 | 62 | 1 | 3.774  | 1 | 4  | 0 | 1 | 0 | 0.03145 |
| 225 | 70 | 1 | 1.332  | 1 | 4  | 0 | 0 | 0 | 0.02447 |
| 226 | 37 | 0 | 0.777  | 2 | 9  | 0 | 1 | 1 | 0.03441 |
| 227 | 65 | 1 | 2.886  | 2 | 14 | 0 | 0 | 0 | 0.04183 |
| 228 | 24 | 1 | 1.332  | 0 | 2  | 0 | 0 | 0 | 0.04317 |
| 229 | 75 | 1 | 1.887  | 1 | 6  | 0 | 0 | 1 | 0.03559 |

|     |    |   |       |   |    |   |   |   |         |
|-----|----|---|-------|---|----|---|---|---|---------|
| 230 | 77 | 0 | 1.332 | 1 | 7  | 0 | 0 | 1 | 0.06693 |
| 231 | 45 | 1 | 1.776 | 1 | 11 | 0 | 0 | 1 | 0.11739 |
| 232 | 76 | 1 | 1.665 | 1 | 8  | 0 | 0 | 0 | 0.02614 |
| 233 | 84 | 1 | 2.109 | 0 | 0  | 0 | 0 | 0 | 0.04452 |
| 234 | 89 | 1 | 1.332 | 1 | 8  | 0 | 0 | 0 | 0.04274 |
| 235 | 56 | 1 | 1.920 | 0 | 3  | 0 | 0 | 1 | 0.12549 |
| 236 | 86 | 1 | 2.331 | 2 | 7  | 0 | 0 | 0 | 0.02438 |
| 237 | 74 | 1 | 2.509 | 2 | 6  | 0 | 0 | 0 | 0.02546 |
| 238 | 81 | 1 | 2.553 | 2 | 5  | 0 | 1 | 0 | 0.02926 |
| 239 | 74 | 1 | 1.554 | 2 | 9  | 0 | 0 | 0 | 0.03053 |
| 240 | 37 | 1 | 2.442 | 0 | 3  | 0 | 0 | 1 | 0.02534 |
| 241 | 85 | 0 | 3.996 | 2 | 13 | 1 | 0 | 0 | 0.19245 |
| 242 | 32 | 1 | 2.109 | 0 | 1  | 0 | 0 | 0 | 0.03795 |
| 243 | 76 | 1 | 1.887 | 0 | 4  | 0 | 0 | 0 | 0.03081 |
| 244 | 80 | 1 | 1.221 | 0 | 0  | 0 | 0 | 1 | 0.01705 |
| 245 | 75 | 1 | 1.110 | 0 | 1  | 0 | 0 | 0 | 0.03896 |
| 246 | 92 | 1 | 1.887 | 1 | 4  | 0 | 0 | 0 | 0.03436 |
| 247 | 56 | 0 | 0.999 | 0 | 1  | 0 | 0 | 0 | 0.02245 |
| 248 | 58 | 1 | 1.998 | 0 | 1  | 0 | 0 | 0 | 0.02344 |
| 249 | 63 | 1 | 0.888 | 2 | 9  | 0 | 0 | 0 | 0.06944 |
| 250 | 48 | 1 | 1.587 | 0 | 4  | 0 | 0 | 0 | 0.01334 |
| 251 | 37 | 0 | 0.555 | 2 | 7  | 0 | 0 | 1 | 0.03166 |
| 252 | 75 | 1 | 5.106 | 2 | 14 | 0 | 1 | 0 | 0.12008 |
| 253 | 60 | 0 | 3.219 | 1 | 5  | 0 | 0 | 0 | 0.02468 |
| 254 | 55 | 0 | 0.888 | 0 | 3  | 0 | 0 | 1 | 0.01809 |
| 255 | 36 | 1 | 1.665 | 1 | 5  | 0 | 0 | 0 | 0.08069 |
| 256 | 73 | 1 | 1.665 | 0 | 3  | 0 | 0 | 0 | 0.03110 |
| 257 | 86 | 0 | 5.106 | 2 | 14 | 0 | 1 | 0 | 0.31761 |
| 258 | 65 | 1 | 2.997 | 2 | 10 | 0 | 0 | 0 | 0.07096 |
| 259 | 55 | 1 | 5.439 | 0 | 0  | 0 | 0 | 0 | 0.02053 |
| 260 | 77 | 1 | 4.995 | 1 | 10 | 1 | 1 | 0 | 0.05121 |
| 261 | 56 | 0 | 3.552 | 2 | 12 | 0 | 1 | 0 | 0.05706 |
| 262 | 62 | 0 | 2.220 | 1 | 13 | 0 | 0 | 0 | 0.05330 |
| 264 | 88 | 0 | 3.663 | 2 | 13 | 1 | 1 | 0 | 0.24227 |
| 265 | 84 | 0 | 1.732 | 0 | 5  | 0 | 0 | 0 | 0.03426 |
| 266 | 51 | 1 | 1.443 | 0 | 2  | 0 | 0 | 0 | 0.04498 |
| 267 | 64 | 0 | 0.888 | 0 | 6  | 0 | 0 | 0 | 0.03154 |
| 268 | 77 | 1 | 3.552 | 0 | 7  | 0 | 0 | 0 | 0.18205 |
| 269 | 89 | 0 | 1.188 | 1 | 10 | 0 | 0 | 0 | 0.02027 |
| 270 | 41 | 0 | 1.665 | 0 | 4  | 1 | 1 | 0 | 0.03828 |
| 271 | 23 | 1 | 1.676 | 0 | 13 | 0 | 0 | 0 | 0.01344 |
| 272 | 78 | 1 | 1.887 | 2 | 9  | 0 | 0 | 1 | 0.07623 |
| 273 | 74 | 1 | 1.887 | 0 | 2  | 0 | 0 | 0 | 0.02967 |

|     |    |   |       |   |    |   |   |   |         |
|-----|----|---|-------|---|----|---|---|---|---------|
| 274 | 88 | 0 | 2.220 | 2 | 10 | 0 | 0 | 0 | 0.03848 |
| 275 | 83 | 1 | 5.772 | 2 | 12 | 0 | 0 | 0 | 0.13243 |
| 276 | 57 | 0 | n.d.  | 1 | 5  | 0 | 0 | 0 | 0.05810 |
| 277 | 78 | 0 | n.d.  | 0 | 4  | 0 | 0 | 0 | 0.06554 |
| 278 | 84 | 1 | n.d.  | 2 | 11 | 0 | 0 | 1 | 0.06928 |
| 279 | 55 | 1 | 1.443 | 0 | 1  | 0 | 0 | 0 | 0.02556 |
| 280 | 72 | 0 | 0.888 | 1 | 2  | 0 | 0 | 0 | 0.03221 |
| 281 | 74 | 0 | 3.108 | 2 | 15 | 1 | 1 | 0 | 0.08476 |
| 282 | 74 | 1 | 1.443 | 0 | 1  | 0 | 0 | 0 | 0.03544 |
| 283 | 87 | 1 | 1.332 | 2 | 5  | 0 | 0 | 0 | 0.02580 |
| 284 | 77 | 1 | 2.331 | 2 | 7  | 0 | 0 | 0 | 0.04976 |
| 285 | 71 | 1 | 3.441 | 1 | 4  | 0 | 0 | 0 | 0.05685 |
| 286 | 34 | 0 | 0.888 | 0 | 2  | 0 | 0 | 0 | 0.02676 |
| 287 | 36 | 0 | 1.554 | 0 | 3  | 0 | 0 | 0 | 0.01869 |
| 288 | 73 | 1 | 1.443 | 1 | 5  | 0 | 0 | 0 | 0.01550 |
| 289 | 89 | 1 | n.d.  | 1 | 5  | 0 | 0 | 0 | 0.02657 |
| 290 | 53 | 0 | 1.632 | 0 | 3  | 0 | 0 | 0 | 0.06125 |
| 291 | 84 | 0 | 4.329 | 2 | 8  | 1 | 1 | 0 | 0.18934 |
| 292 | 72 | 1 | 1.554 | 0 | 3  | 0 | 0 | 0 | 0.02007 |
| 293 | 75 | 0 | 1.221 | 1 | 4  | 0 | 0 | 1 | 0.03212 |
| 294 | 86 | 0 | 3.441 | 3 | 11 | 0 | 0 | 0 | 0.07036 |
| 295 | 75 | 1 | n.d.  | 0 | 6  | 0 | 1 | 1 | 0.01852 |
| 296 | 78 | 0 | 1.865 | 0 | 2  | 0 | 0 | 1 | 0.06846 |
| 297 | 54 | 1 | 1.443 | 2 | 10 | 0 | 0 | 0 | 0.03155 |
| 298 | 70 | 1 | 0.555 | 1 | 7  | 0 | 0 | 1 | 0.05787 |
| 299 | 94 | 1 | 4.107 | 2 | 10 | 1 | 1 | 0 | 0.08486 |
| 300 | 83 | 1 | 2.109 | 1 | 8  | 0 | 0 | 0 | 0.04386 |
| 301 | 71 | 1 | 2.331 | 2 | 3  | 0 | 1 | 0 | 0.15474 |
| 302 | 74 | 1 | 5.328 | 2 | 13 | 0 | 0 | 0 | 0.16342 |
| 303 | 49 | 0 | 1.665 | 0 | 3  | 0 | 0 | 0 | 0.02107 |
| 304 | 76 | 1 | 1.443 | 1 | 10 | 0 | 1 | 0 | 0.03827 |
| 305 | 52 | 0 | n.d.  | 1 | 3  | 0 | 0 | 0 | 0.02005 |
| 306 | 71 | 1 | 1.665 | 0 | 2  | 0 | 0 | 1 | 0.03010 |
| 307 | 22 | 1 | 1.110 | 0 | 2  | 0 | 0 | 0 | 0.01349 |
| 308 | 22 | 0 | 1.554 | 0 | 2  | 0 | 0 | 0 | 0.02808 |
| 309 | 32 | 1 | 1.976 | 1 | 7  | 0 | 0 | 0 | 0.01972 |
| 311 | 71 | 0 | 2.697 | 1 | 4  | 0 | 0 | 0 | 0.02517 |
| 312 | 81 | 1 | 5.106 | 1 | 6  | 0 | 0 | 0 | 0.06342 |
| 313 | 75 | 1 | 2.220 | 3 | 10 | 0 | 0 | 0 | 0.04715 |
| 314 | 61 | 1 | 2.031 | 0 | 3  | 0 | 0 | 0 | 0.02063 |
| 315 | 74 | 1 | 1.765 | 1 | 7  | 0 | 0 | 0 | 0.10541 |
| 316 | 78 | 1 | n.d.  | 0 | 3  | 0 | 0 | 0 | 0.03852 |
| 317 | 81 | 1 | 3.885 | 1 | 12 | 0 | 0 | 0 | 0.28514 |



|     |    |   |       |   |    |   |   |   |         |
|-----|----|---|-------|---|----|---|---|---|---------|
| 318 | 69 | 0 | 1.443 | 2 | 9  | 0 | 0 | 1 | 0.03738 |
| 319 | 70 | 1 | 2.065 | 0 | 1  | 0 | 0 | 0 | 0.01701 |
| 320 | 86 | 0 | 2.997 | 1 | 8  | 0 | 0 | 0 | 0.08322 |
| 321 | 48 | 0 | 3.630 | 1 | 7  | 0 | 1 | 0 | 0.13469 |
| 322 | 82 | 0 | 1.110 | 0 | 2  | 0 | 0 | 0 | 0.01805 |
| 323 | 92 | 1 | 1.665 | 0 | 5  | 0 | 0 | 0 | 0.11392 |
| 324 | 79 | 1 | 0.777 | 1 | 8  | 0 | 1 | 0 | 0.06744 |
| 325 | 71 | 1 | 1.110 | 0 | 0  | 0 | 0 | 0 | 0.02575 |
| 326 | 78 | 1 | 1.776 | 0 | 4  | 0 | 0 | 1 | 0.09659 |
| 327 | 86 | 0 | 1.998 | 0 | 4  | 0 | 0 | 1 | 0.05651 |
| 328 | 59 | 0 | 1.110 | 0 | 1  | 0 | 0 | 0 | 0.01774 |
| 329 | 92 | 0 | 1.554 | 2 | 6  | 0 | 0 | 0 | 0.04228 |
| 330 | 49 | 0 | 2.109 | 0 | 4  | 0 | 0 | 0 | 0.02140 |
| 331 | 59 | 1 | 9.102 | 3 | 10 | 1 | 1 | 0 | 0.29027 |
| 332 | 32 | 0 | 1.110 | 0 | 2  | 0 | 0 | 0 | 0.04929 |
| 333 | 25 | 1 | 1.443 | 0 | 1  | 0 | 0 | 0 | 0.01655 |
| 334 | 27 | 0 | 1.221 | 1 | 5  | 0 | 0 | 1 | 0.01886 |
| 335 | 71 | 0 | 0.999 | 0 | 0  | 0 | 0 | 1 | 0.02140 |
| 336 | 77 | 0 | 3.663 | 1 | 5  | 1 | 1 | 0 | 0.08419 |
| 338 | 67 | 1 | 3.552 | 3 | 15 | 0 | 1 | 0 | 0.14123 |
| 339 | 87 | 1 | 3.108 | 1 | 13 | 0 | 0 | 0 | 0.08635 |
| 340 | 81 | 1 | 3.608 | 1 | 8  | 0 | 0 | 0 | 0.03952 |
| 341 | 33 | 1 | 2.220 | 1 | 6  | 0 | 1 | 0 | 0.04397 |
| 342 | 87 | 1 | 1.221 | 1 | 5  | 0 | 0 | 0 | 0.03806 |
| 343 | 45 | 1 | 1.332 | 0 | 2  | 0 | 0 | 1 | 0.03195 |
| 344 | 94 | 1 | 1.221 | 0 | 5  | 0 | 0 | 0 | 0.01582 |
| 345 | 83 | 0 | 2.331 | 2 | 11 | 0 | 1 | 0 | 0.06073 |
| 346 | 80 | 1 | 1.887 | 1 | 4  | 0 | 0 | 1 | 0.05933 |
| 347 | 27 | 1 | 1.332 | 0 | 4  | 0 | 0 | 0 | 0.01884 |
| 348 | 80 | 1 | 1.776 | 0 | 2  | 0 | 0 | 0 | 0.01481 |
| 349 | 19 | 1 | 2.220 | 0 | 1  | 0 | 0 | 0 | 0.01687 |
| 350 | 82 | 0 | 2.298 | 3 | 12 | 0 | 0 | 1 | 0.05685 |
| 351 | 78 | 0 | 1.332 | 0 | 0  | 0 | 0 | 0 | 0.03223 |
| 352 | 56 | 1 | 2.331 | 0 | 6  | 0 | 0 | 1 | 0.04101 |
| 353 | 80 | 1 | 1.965 | 0 | 6  | 0 | 0 | 0 | 0.04711 |
| 354 | 40 | 0 | 1.776 | 0 | 7  | 0 | 0 | 0 | 0.04095 |
| 355 | 29 | 0 | 1.110 | 0 | 0  | 0 | 0 | 0 | 0.01553 |
| 356 | 83 | 1 | 2.109 | 2 | 15 | 0 | 1 | 0 | 0.02177 |
| 357 | 80 | 1 | 1.332 | 2 | 9  | 0 | 0 | 0 | 0.02161 |
| 358 | 28 | 1 | 2.442 | 0 | 4  | 0 | 0 | 0 | 0.01298 |
| 359 | 67 | 1 | 1.776 | 1 | 5  | 0 | 0 | 0 | 0.02483 |
| 360 | 65 | 1 | 1.443 | 1 | 7  | 0 | 0 | 1 | 0.11533 |
| 361 | 76 | 1 | 2.664 | 2 | 7  | 1 | 1 | 0 | 0.07574 |

|     |    |   |        |   |    |   |   |   |         |
|-----|----|---|--------|---|----|---|---|---|---------|
| 362 | 18 | 0 | n.d.   | 0 | 2  | 0 | 0 | 0 | 0.03671 |
| 363 | 77 | 1 | 1.554  | 2 | 5  | 0 | 0 | 1 | 0.02947 |
| 364 | 80 | 0 | 15.984 | 2 | 8  | 1 | 1 | 0 | 0.32225 |
| 365 | 80 | 0 | 4.107  | 1 | 13 | 0 | 0 | 0 | 0.07308 |
| 366 | 78 | 0 | 2.775  | 2 | 5  | 0 | 0 | 0 | 0.08791 |
| 367 | 75 | 1 | n.d.   | 0 | 5  | 0 | 0 | 0 | 0.04593 |
| 368 | 71 | 1 | 9.713  | 1 | 7  | 0 | 0 | 0 | 0.08555 |
| 370 | 84 | 0 | 1.665  | 1 | 10 | 0 | 0 | 0 | 0.07512 |
| 371 | 54 | 1 | 2.997  | 0 | 10 | 0 | 1 | 0 | 0.07247 |
| 372 | 70 | 1 | 2.553  | 1 | 10 | 0 | 0 | 0 | 0.05554 |
| 373 | 79 | 0 | 1.332  | 0 | 1  | 0 | 0 | 0 | 0.02119 |
| 374 | 30 | 0 | 5.961  | 1 | 5  | 0 | 0 | 0 | 0.03121 |
| 375 | 75 | 0 | 4.551  | 3 | 6  | 0 | 0 | 0 | 0.02511 |
| 376 | 79 | 1 | 6.549  | 2 | 12 | 1 | 1 | 0 | 0.23757 |
| 377 | 35 | 0 | 1.554  | 0 | 5  | 0 | 0 | 0 | 0.01512 |
| 378 | 77 | 0 | 1.665  | 0 | 3  | 0 | 0 | 0 | 0.03022 |
| 379 | 61 | 0 | 1.809  | 2 | 6  | 0 | 0 | 0 | 0.02229 |
| 380 | 86 | 1 | 1.776  | 1 | 9  | 0 | 0 | 1 | 0.08178 |
| 381 | 57 | 1 | 1.299  | 0 | 3  | 0 | 0 | 0 | 0.02495 |
| 382 | 75 | 1 | 2.442  | 1 | 10 | 0 | 1 | 1 | 0.12841 |
| 383 | 98 | 1 | 2.220  | 2 | 7  | 0 | 0 | 0 | 0.06796 |
| 384 | 25 | 1 | 2.020  | 1 | 1  | 0 | 0 | 1 | 0.01658 |
| 385 | 27 | 0 | 1.110  | 1 | 1  | 0 | 0 | 0 | 0.01677 |
| 386 | 70 | 1 | 3.441  | 2 | 9  | 0 | 0 | 1 | 0.06127 |
| 387 | 84 | 1 | 4.662  | 1 | 12 | 0 | 0 | 0 | 0.06395 |
| 388 | 53 | 1 | 2.331  | 2 | 12 | 0 | 1 | 0 | 0.04894 |
| 389 | 45 | 1 | 2.142  | 0 | 5  | 0 | 0 | 1 | 0.04354 |
| 390 | 51 | 1 | 2.331  | 0 | 3  | 0 | 0 | 0 | 0.04203 |
| 391 | 78 | 1 | 2.109  | 1 | 4  | 0 | 0 | 0 | 0.03210 |
| 392 | 82 | 1 | 1.998  | 1 | 6  | 0 | 0 | 0 | 0.06512 |
| 393 | 64 | 1 | 1.998  | 0 | 3  | 0 | 0 | 1 | 0.16962 |
| 394 | 72 | 0 | 1.443  | 0 | 0  | 0 | 0 | 0 | 0.02813 |
| 395 | 79 | 1 | 1.665  | 0 | 1  | 0 | 0 | 1 | 0.03976 |
| 396 | 34 | 0 | 2.331  | 0 | 3  | 0 | 0 | 0 | 0.01668 |
| 397 | 76 | 0 | 1.332  | 0 | 1  | 0 | 0 | 1 | 0.02628 |
| 398 | 69 | 1 | 5.439  | 1 | 7  | 0 | 0 | 1 | 0.06959 |
| 399 | 72 | 1 | 3.996  | 2 | 9  | 0 | 0 | 0 | 0.02944 |
| 400 | 25 | 1 | 1.665  | 0 | 4  | 0 | 0 | 1 | 0.02691 |
| 401 | 76 | 0 | 1.776  | 2 | 11 | 0 | 0 | 0 | 0.03452 |
| 402 | 57 | 1 | 2.198  | 0 | 5  | 0 | 0 | 0 | 0.05809 |
| 403 | 34 | 0 | 1.332  | 0 | 4  | 0 | 0 | 1 | 0.02100 |
| 404 | 94 | 1 | 7.215  | 1 | 10 | 1 | 1 | 0 | 0.13577 |
| 405 | 48 | 0 | n.d.   | 0 | 0  | 0 | 0 | 0 | 0.01415 |

|     |    |   |       |   |    |   |   |   |         |
|-----|----|---|-------|---|----|---|---|---|---------|
| 406 | 63 | 1 | 1.221 | 0 | 3  | 1 | 0 | 0 | 0.02282 |
| 407 | 68 | 0 | 2.808 | 1 | 11 | 1 | 1 | 1 | 0.52222 |
| 408 | 71 | 1 | 1.654 | 0 | 4  | 0 | 0 | 0 | 0.03456 |
| 409 | 58 | 1 | 2.331 | 1 | 9  | 0 | 1 | 0 | 0.39159 |
| 410 | 72 | 0 | n.d.  | 0 | 3  | 0 | 0 | 0 | 0.02842 |
| 411 | 58 | 0 | 2.220 | 0 | 8  | 0 | 0 | 0 | 0.05157 |
| 412 | 87 | 1 | 1.443 | 1 | 6  | 0 | 0 | 1 | 0.05963 |
| 413 | 88 | 0 | 1.554 | 2 | 12 | 1 | 1 | 0 | 0.07390 |
| 414 | 79 | 0 | 2.109 | 0 | 2  | 0 | 0 | 0 | 0.05620 |
| 415 | 34 | 0 | 1.088 | 0 | 3  | 0 | 0 | 0 | 0.03279 |
| 416 | 60 | 0 | 1.243 | 1 | 6  | 0 | 0 | 0 | 0.01975 |
| 417 | 78 | 0 | 2.109 | 0 | 7  | 1 | 1 | 0 | 0.08906 |
| 418 | 89 | 0 | 1.476 | 1 | 6  | 0 | 0 | 0 | 0.03436 |
| 419 | 77 | 1 | 1.221 | 1 | 5  | 1 | 1 | 0 | 0.03335 |

**Supplemental Table S1: Additional Patient Characteristics**

| <b>Characteristics</b>             | <b>All<br/>(n=312)</b> | <b>Survival and/or<br/>Discharge<br/>n=290 (92.9%)</b> | <b>In-Hospital<br/>Mortality<br/>n=22 (7.1%)</b> | <b>p-<br/>values</b> |
|------------------------------------|------------------------|--------------------------------------------------------|--------------------------------------------------|----------------------|
| Age [years]                        | 72.5 (57.0, 80.0)      | 72.0 (57.0, 80.0)                                      | 77.5 (69.5, 84.8)                                | <b>0.02</b>          |
| Sex [female]                       | 132 (42.3%)            | 119 (41.0%)                                            | 13 (59.1%)                                       | 0.12                 |
| <b>Vital Signs at presentation</b> |                        |                                                        |                                                  |                      |
| qSOFA $\geq$ 2                     | 76 (24.4%)             | 65 (22.4%)                                             | 11 (50.0%)                                       | <b>&lt;0.01</b>      |
| NEWS2                              | 5 (3, 8)               | 5 (3, 8)                                               | 9 (6, 12)                                        | <0.01                |
| MEWS                               | 4 (2, 5)               | 4 (2, 5)                                               | 4 (4, 7)                                         | <0.01                |
| <b>Biomarkers</b>                  |                        |                                                        |                                                  |                      |
| Procalcitonin [ $\mu$ g/L]         | 305; 0.3 (0.1, 1.1)    | 283; 0.3 (0.1, 0.9)                                    | 1.7 (0.3, 26.6)                                  | <b>&lt;0.01</b>      |
| Lactate [mmol/L]                   | 301; 1.9 (1.4, 2.5)    | 279; 1.8 (1.4, 2.3)                                    | 3.1 (2.2, 4.3)                                   | <b>&lt;0.01</b>      |
| IMX-SEV-2                          | 0.04 (0.03, 0.07)      | 0.04 (0.03, 0.06)                                      | 0.09 (0.07, 0.19)                                | <b>&lt;0.01</b>      |
| <b>Infection Outcome and Focus</b> |                        |                                                        |                                                  |                      |
| Bacterial Infection*               | 239 (76.6%)            | 219 (75.5%)                                            | 20 (90.9%)                                       | 0.12                 |
| Viral Infection*                   | 86 (27.6%)             | 83 (28.6%)                                             | 3 (13.6%)                                        | 0.15                 |
| No Infection                       | 32 (10.3%)             | 30 (10.3%)                                             | 2 (9.1%)                                         | 1.00                 |
| Pulmonary Focus                    | 90 (28.8%)             | 87 (30.0%)                                             | 3 (13.6%)                                        | 0.14                 |
| Urogenital Focus                   | 58 (18.6%)             | 58 (20.0%)                                             | 0 (0.0%)                                         | <b>0.02</b>          |
| Intraabdominal Focus               | 13 (4.2%)              | 11 (3.8%)                                              | 2 (9.1%)                                         | 0.23                 |
| Soft tissue/skin/bone Focus        | 11 (3.5%)              | 11 (3.8%)                                              | 0 (0.0%)                                         | 1.00                 |
| Blood/Catheter Focus               | 9 (2.9%)               | 8 (2.8%)                                               | 1 (4.5%)                                         | 0.49                 |
| CNS Focus                          | 5 (1.6%)               | 4 (1.4%)                                               | 1 (4.5%)                                         | 0.31                 |
| No Clear or Multiple Foci          | 94 (30.1%)             | 81 (27.9%)                                             | 13 (59.1%)                                       | <b>&lt;0.01</b>      |
| <b>Outcomes</b>                    |                        |                                                        |                                                  |                      |
| Mechanical Ventilation             | 21 (6.7%)              | 13 (4.5%)                                              | 8 (36.4%)                                        | <b>&lt;0.01</b>      |
| 72h multi-organ failure            | 58 (18.6%)             | 39 (13.4%)                                             | 19 (86.4%)                                       | <b>&lt;0.01</b>      |
| ICU Admission                      | 71 (22.8%)             | 56 (19.3%)                                             | 15 (68.2%)                                       | <b>&lt;0.01</b>      |
| 90-day all-cause mortality         | 43 (13.8%)             | 21 (7.2%)                                              | 22 (100.0%)                                      | <b>&lt;0.01</b>      |

Continuous variables are presented with median and interquartile range and compared using Mann-Whitney U Test. Nominal variables are presented with frequency and column percentage, and compared using Fisher's Exact Test. The number of cases with valid data is shown for variables with missing data; qSOFA = Quick Sequential Organ Failure Assessment; NEWS2 = National Early Warning Score 2; CNS = Central Nervous System. \*Includes bacterial-viral co-infections.

**Table S2. List of reasons patients were considered to be immunosuppressed**

---

**Causes of Immunosuppression**

---

Chemotherapy within the last 6 months

Hemato-oncological disease

High-dose systemic steroid therapy

Methotrexate therapy

Azathioprine therapy

Neutropenia (absolute neutrophil count <500/nl)

---

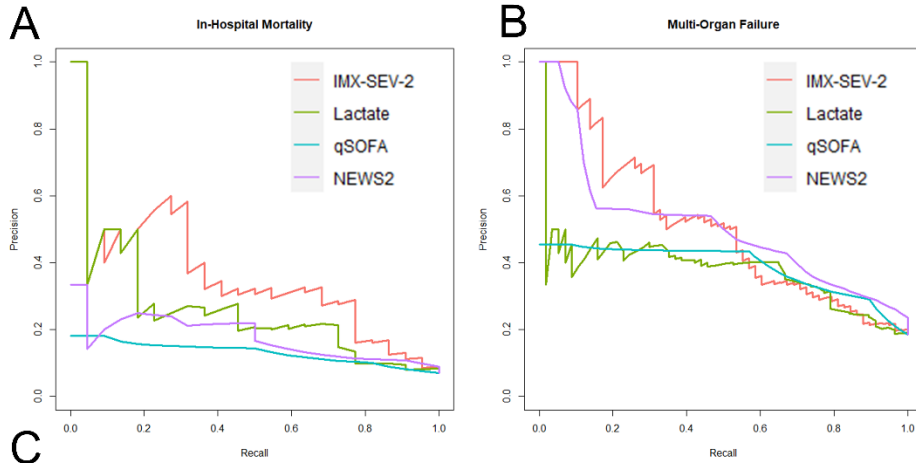

**C**

|                  | <b>In-Hospital Mortality</b> | <b>Multi-Organ Failure within 72h</b> |
|------------------|------------------------------|---------------------------------------|
| <b>IMX-SEV-2</b> | 0.36 (0.19-0.58)             | 0.51 (0.39-0.63)                      |
| <b>Lactate</b>   | 0.26 (0.12-0.47)             | 0.38 (0.27-0.51)                      |
| <b>qSOFA</b>     | 0.13 (0.07-0.27)             | 0.39 (0.28-0.51)                      |
| <b>NEWS2</b>     | 0.18 (0.09-0.47)             | 0.51 (0.36-0.63)                      |

**Supplemental Figure S1. Precision Recall Curves of IMX-SEV-2 compared to SOC parameters.**

**Table S3. Accuracy of IMX-SEV-2 and comparators using single thresholds.**

| <b>Biomarker (threshold)</b>                            | <b>In-Hospital Mortality</b> |                     | <b>Multi-Organ Failure within 72h</b> |                   |
|---------------------------------------------------------|------------------------------|---------------------|---------------------------------------|-------------------|
|                                                         | Died<br>n = 22               | Survived<br>n = 290 | MOF<br>n = 58                         | No MOF<br>n = 254 |
|                                                         | LR+                          | LR-                 | LR+                                   | LR-               |
| IMX-SEV-2 ( $\geq 0.042$ )                              | 2.14                         | 0.23                | 1.96                                  | 0.44              |
| IMX-SEV-2 ( $\geq 0.157$ )                              | 9.23                         | 0.71                | 8.03                                  | 0.83              |
| Lactate ( $\geq 2$ mmol/l)                              | 1.78                         | 0.40                | 1.90                                  | 0.42              |
| qSOFA ( $\geq 2$ )                                      | 2.23                         | 0.64                | 3.36                                  | 0.52              |
| NEWS2 ( $\geq 5$ , or $\geq 3$ for any single category) | 1.51                         | 0.23                | 1.72                                  | 0.12              |
| NEWS2 ( $\geq 7$ )                                      | 1.88                         | 0.50                | 2.45                                  | 0.37              |
|                                                         | Sens.                        | Spec.               | Sens.                                 | Spec.             |
| IMX-SEV-2 ( $\geq 0.042$ )                              | 86.4%                        | 59.7%               | 72.4%                                 | 63.0%             |
| IMX-SEV-2 ( $\geq 0.157$ )                              | 31.8%                        | 96.6%               | 19.0%                                 | 97.6%             |
| Lactate ( $\geq 2$ mmol/l)                              | 77.3%                        | 56.6%               | 74.1%                                 | 61.0%             |
| qSOFA ( $\geq 2$ )                                      | 50.0%                        | 77.6%               | 56.9%                                 | 83.1%             |
| NEWS2 ( $\geq 5$ , or $\geq 3$ for any single category) | 90.9%                        | 39.7%               | 94.8%                                 | 44.9%             |
| NEWS2 ( $\geq 7$ )                                      | 68.2%                        | 63.8%               | 74.1%                                 | 69.7%             |

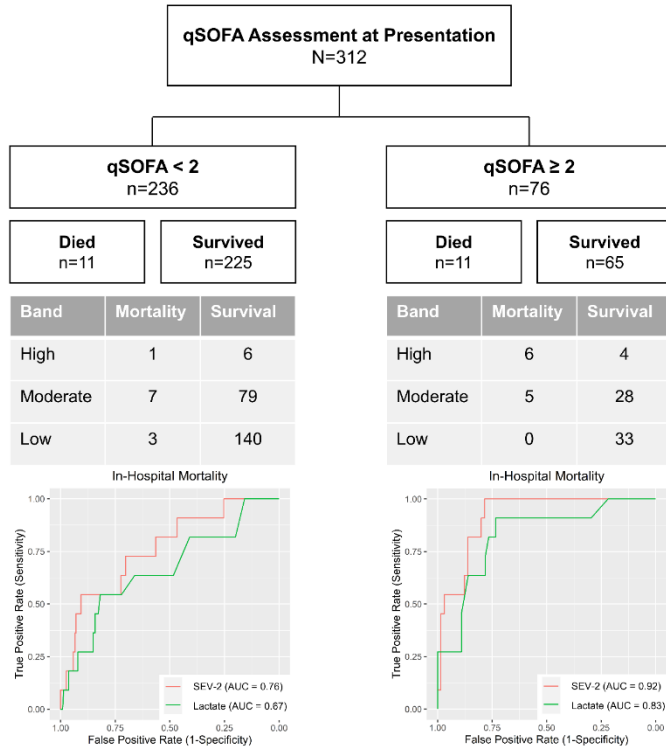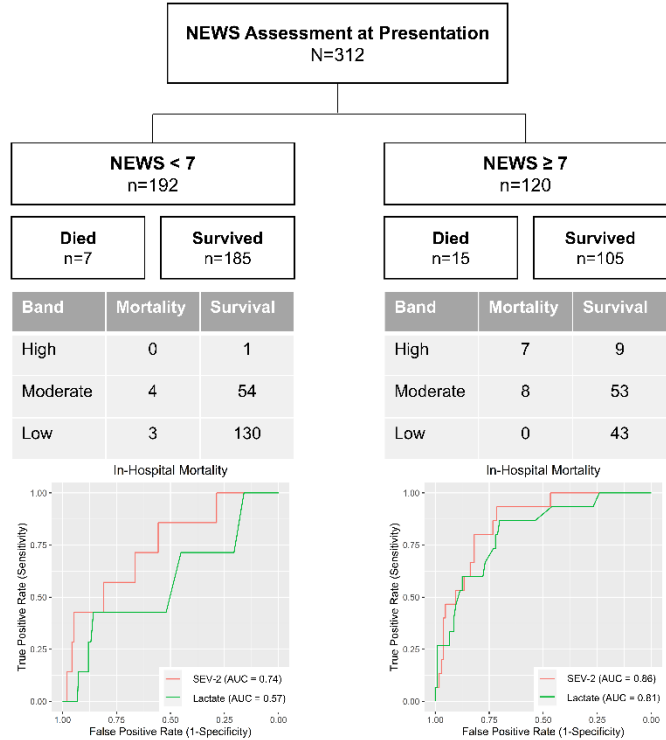

**Supplemental Figure S2. Decision Tree for Combining qSOFA (A) or NEWS (B) and IMX-SEV-2**



**Table S4: Subgroup effect analysis by linear regression with IMX-SEV-2 as dependent variable**

| <b>Marker</b>         | <b>Estimate</b> | <b>Standard Error</b> | <b>P-value</b> |
|-----------------------|-----------------|-----------------------|----------------|
| (Intercept)           | 0.0027          | 0.0232                | 0.9063         |
| In-Hospital Mortality | 0.0733          | 0.0189                | 0.0001         |
| Multi-Organ Failure   | 0.0476          | 0.0128                | 0.0003         |
| Age                   | 0.0002          | 0.0003                | 0.4448         |
| Immunocompromised     | 0.0190          | 0.0122                | 0.1217         |
| Male Sex              | 0.0016          | 0.0096                | 0.8706         |
| Bacterial infection   | 0.0289          | 0.0169                | 0.0895         |
| Viral infection       | 0.0113          | 0.0128                | 0.3821         |

| Study identifier                    | First author   | Study description                                 | N   | Age [years]                 | Female (%)           | Platform   | Country   | Mortality (%) |
|-------------------------------------|----------------|---------------------------------------------------|-----|-----------------------------|----------------------|------------|-----------|---------------|
| <a href="#">E-MEXP-3589</a>         | Almansa        | Patients hospitalized with COPD exacerbation      | 27  | 70.1 <sup>a</sup>           | 6 (22) <sup>b</sup>  | Agilent    | Spain     | 0 (0)         |
| <a href="#">E-MTAB-1548</a>         | Almansa        | Surgical patients with sepsis (EXPRESS)           | 140 | Median 72 (IQR 61-78)       | 44 (31) <sup>b</sup> | Agilent    | Spain     | 12 (9)        |
| <a href="#">E-MTAB-3162</a>         | van de Weg     | Patients with dengue                              | 21  | Median 20 (IQR 17-28)       | 10 (48)              | Affymetrix | Indonesia | 0 (0)         |
| <a href="#">GSE13015 (GPL6102)</a>  | Pankla         | Sepsis, many cases from burkholderia              | 45  | Median 54 (IQR 48-61)       | 19 (42)              | Illumina   | Thailand  | 13 (29)       |
| <a href="#">GSE13015 (GPL6947)</a>  | Pankla         | Sepsis, many cases from burkholderia              | 15  | Median 49 (IQR 43.5-59.5)   | 9 (60)               | Illumina   | Thailand  | 7 (47)        |
| <a href="#">GSE21802</a>            | Bermejo-Martin | Pandemic H1N1 in ICU                              | 10  | unknown                     | unknown              | Illumina   | Canada    | 2 (20)        |
| <a href="#">GSE22098</a>            | Berry          | Patients with active TB and other IDs             | 193 | Median 16 (IQR 11-26)       | 134 (69)             | Illumina   | UK        | 0 (0)         |
| <a href="#">GSE25504 (GPL13667)</a> | Smith          | Neonatal sepsis                                   | 12  | Median 0 (IQR 0-0)          | 4 (33)               | Affymetrix | UK        | 1 (8)         |
| <a href="#">GSE25504 (GPL6947)</a>  | Smith          | Neonatal sepsis                                   | 21  | Median 0 (IQR 0-0)          | 10 (48)              | Illumina   | UK        | 1 (5)         |
| <a href="#">GSE27131</a>            | Berdal         | Severe H1N1                                       | 7   | Median 38 (IQR 33-50)       | 1 (14)               | Affymetrix | Norway    | 2 (29)        |
| <a href="#">GSE28991</a>            | Naim           | Acute dengue                                      | 11  | unknown                     | unknown              | Illumina   | unknown   | 0 (0)         |
| <a href="#">GSE30119</a>            | Banchereau     | Patients with active TB and other IDs             | 59  | Median 6.5 (IQR 1.92-11)    | 25 (42)              | Illumina   | USA       | 0 (0)         |
| <a href="#">GSE32707</a>            | Dolinay        | Critically ill patients in Brigham \& Women's ICU | 69  | Median 57 (IQR 46-66)       | 34 (49)              | Illumina   | USA       | 25 (36)       |
| <a href="#">GSE40012</a>            | Parnell        | Bacterial or influenza A pneumonia or SIRS        | 39  | Median 58 (IQR 44-66)       | 18 (46)              | Illumina   | Australia | 5 (13)        |
| <a href="#">GSE40165</a>            | Nguyen         | Children and adolescents with dengue              | 123 | Median 12 (IQR 10-14)       | 38 (31)              | Illumina   | Vietnam   | 0 (0)         |
| <a href="#">GSE40396</a>            | Hu             | Febrile young children                            | 30  | Median 0.92 (IQR 0.33-1.6)  | 13 (43)              | Illumina   | USA       | 0 (0)         |
| <a href="#">GSE40586</a>            | Lill           | Community-acquired bacterial meningitis           | 15  | Median 57 (IQR 53-70.5)     | unknown              | Affymetrix | Estonia   | 2 (13)        |
| <a href="#">GSE42026</a>            | Herberg        | Children with H1N1/09, RSV or bacterial infection | 59  | Median 1.25 (IQR 0.38-4)    | 26 (44)              | Illumina   | UK        | 0 (0)         |
| <a href="#">GSE47655</a>            | Stone          | Acute anaphylaxis                                 | 6   | unknown                     | unknown              | Affymetrix | Australia | 0 (0)         |
| <a href="#">GSE51808</a>            | Kwissa         | Dengue patients                                   | 28  | unknown                     | unknown              | Affymetrix | Thailand  | 0 (0)         |
| <a href="#">GSE54514</a>            | Parnell        | Critically ill septic patients                    | 19  | Median 65 (IQR 46-76)       | 11 (58)              | Illumina   | Australia | 4 (21)        |
| <a href="#">GSE57183</a>            | Senoi          | SJIA patients                                     | 11  | Median 3.6 (IQR 3.3-7.3)    | 6 (55)               | Illumina   | USA       | 0 (0)         |
| <a href="#">GSE60244</a>            | Suarez         | Lower respiratory tract infections                | 118 | Median 62 (IQR 50-76)       | 69 (58)              | Illumina   | USA       | 0 (0)         |
| <a href="#">GSE63881</a>            | Hoang          | Kawasaki disease                                  | 171 | Median 2.75 (IQR 1.42-4.25) | 69 (40)              | Illumina   | USA       | 0 (0)         |
| <a href="#">GSE64456</a>            | Mahajan        | Febrile infants (60 days of age and younger)      | 279 | Median 0.10 (IQR 0.06-0.13) | 123 (44)             | Illumina   | USA       | 0 (0)         |

|                           |                           |                                                     |     |                             |                      |            |             |         |
|---------------------------|---------------------------|-----------------------------------------------------|-----|-----------------------------|----------------------|------------|-------------|---------|
| <a href="#">GSE65682</a>  | Sciicluna                 | Suspected but negative for CAP                      | 106 | Median 63.5 (IQR 52.3-72.8) | 44 (42)              | Affymetrix | Netherlands | 23 (22) |
| <a href="#">GSE66099</a>  | Sweeney                   | Pediatric ICU (sepsis, septic shock, or SIRS)       | 229 | Median 2.5 (IQR 1.1-6.1)    | 90 (39)              | Affymetrix | USA         | 28 (12) |
| <a href="#">GSE67059</a>  | Heinonen                  | Children with HRV infection                         | 80  | Median 0.83 (IQR 0.3-1.29)  | 27 (34)              | Illumina   | USA         | 0 (0)   |
| <a href="#">GSE68310</a>  | Zhai                      | Outpatients with acute respiratory viral infections | 104 | Median 21.0 (IQR 20.1-22.8) | 54 (52)              | Illumina   | USA         | 0 (0)   |
| <a href="#">GSE72810</a>  | Herberg                   | Children with H1N1/09, RSV or bacterial infection   | 72  | Median 1.79 (IQR 0.56-4.56) | 31 (43)              | Illumina   | UK          | 0 (0)   |
| <a href="#">GSE73461</a>  | Wright                    | Children with various IDs                           | 404 | Median 2.71 (IQR 0.83-8.04) | 177 (44)             | Illumina   | UK          | 0 (0)   |
| <a href="#">GSE77087</a>  | de Steenhuijsen<br>Piters | Children with RSV infection                         | 41  | Median 0.45 (IQR 0.14-0.69) | 16 (39)              | Illumina   | USA         | 0 (0)   |
| <a href="#">GSE82050</a>  | Tang                      | Moderate and severe influenza infection             | 24  | Median 64.5 (IQR 48.5-74.3) | 9 (38) <sup>b</sup>  | Agilent    | Germany     | 0 (0)   |
| <a href="#">GSE95233</a>  | Venet                     | Septic shock                                        | 51  | Median 66 (IQR 53.5-73.5)   | 18 (35) <sup>b</sup> | Affymetrix | France      | 17 (33) |
| <a href="#">GSE103842</a> | Rodriguez-<br>Fernandez   | Children with RSV infection                         | 62  | Median 0.25 (IQR 0.17-0.44) | 23 (37)              | Illumina   | USA         | 0 (0)   |
| AUS-NS                    | Tang                      | Patients with infections; primarily influenza       | 587 | Median 54 (IQR 34.2-68)     | 329 (56)             | NanoString | Australia   | 33 (6)  |

**Table S5: Characteristics and composition of training studies for IMX-SEV-2.**

ID = Infectious Disease; COPD = Chronic Obstructive Pulmonary Disease; ICU = Intensive Care Unit, CAP = Community-Acquired Pneumonia; SIRS = Systemic Inflammatory Response Syndrome; TB = Tuberculosis; SJIA = Systemic Juvenile Idiopathic Arthritis; HRV = Human Rhinovirus; RSV = Respiratory Syncytial Virus. <sup>a</sup>Study description is taken from the study's corresponding publication and includes some patients that were excluded from the training set. <sup>b</sup>Numbers and percentages shown reflect the fact that some patients in the study had unknown/unreported sex.

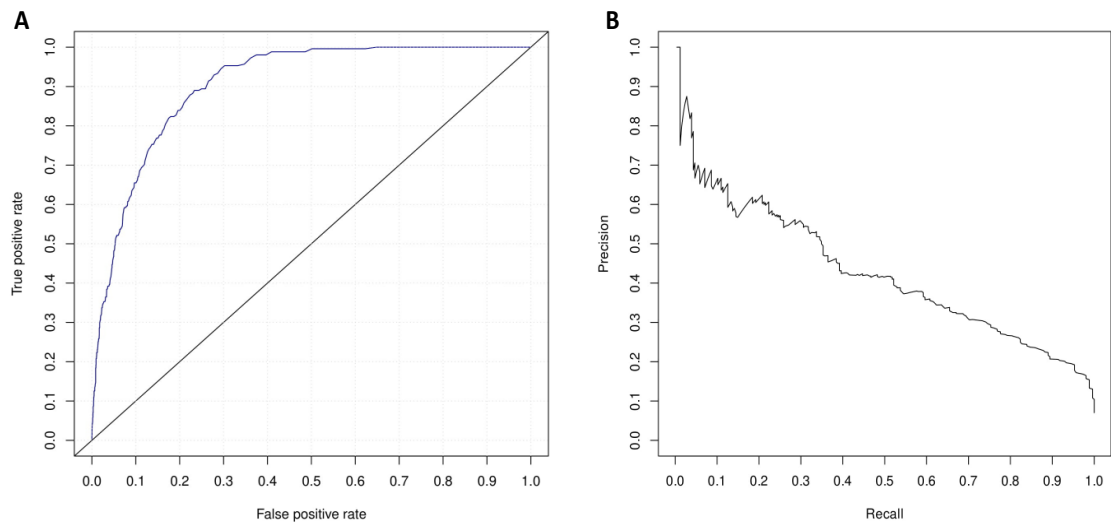

**Figure S3.** Shown are the receiver operating characteristic (A) and precision-recall (B) curves for the IMX-SEV-2 classifier. Both curves are based on pooled predicted probabilities from the five folds of grouped cross-validation.

### Supplementary References

1. Mayhew MB, Buturovic L, Luethy R, Midic U, Moore AR, Roque JA, Shaller BD, Asuni T, Rawling D, Rimmel M *et al*: **A generalizable 29-mRNA neural-network classifier for acute bacterial and viral infections.** *Nat Commun* 2020, **11**(1):1177.
2. Sweeney TE, Perumal TM, Henao R, Nichols M, Howrylak JA, Choi AM, Bermejo-Martin JF, Almansa R, Tamayo E, Davenport EE *et al*: **A community approach to mortality prediction in sepsis via gene expression analysis.** *Nature Communications* 2018, **9**(1):694.
3. Sweeney TE, Wong HR, Khatri P: **Robust classification of bacterial and viral infections via integrated host gene expression diagnostics.** *Sci Transl Med* 2016, **8**(346):346ra391.
4. H2O.ai: **H2O Driverless AI.** In., 1.8.0 edn; 2019.
